# Supplementary material for: Proteases Shape the Chlamydomonas Secretome: Comparison to Classical Neuropeptide Processing Machinery
Source: MDPI journal article supplement (doi:10.3390/proteomes6040036), 2018-09-23
Supplement: s1 [file s1]

Supplemental Fig.1. Alignment of five S8 subtilisin-like *C. reinhardtii* and human proteins.

MSA *The multiple sequence alignment result as produced by T-coffee.*

T-COFFEE, Version\_11.00.8cbe486 (2014-08-12 22:05:29 - Revision 8cbe486 - Build 477)  
Cedric Notredame; SCORE=62. \*BAD AVG GOOD\* TCS (transitive consistency score) color code goes from 0 (blue) to 9 (red).

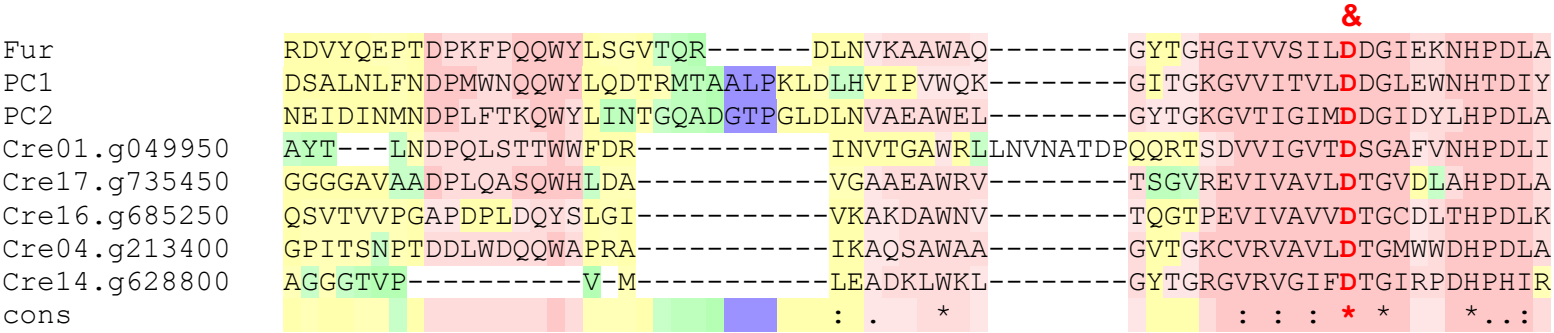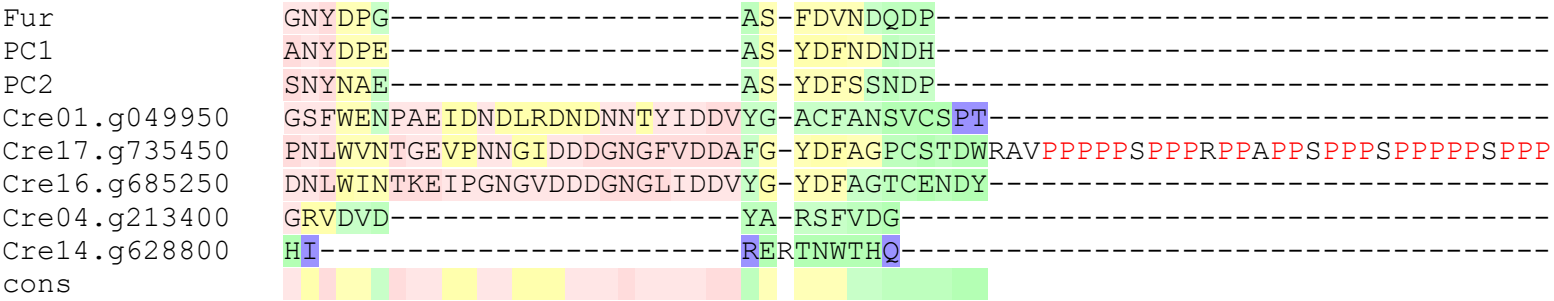

Cre17.g735450 RPRPPSPPPPPKRAPPPARKTSGRRLVSGAAATHGGRLLSALLGSVWGAGSSEALEATESLQHAQQAATA

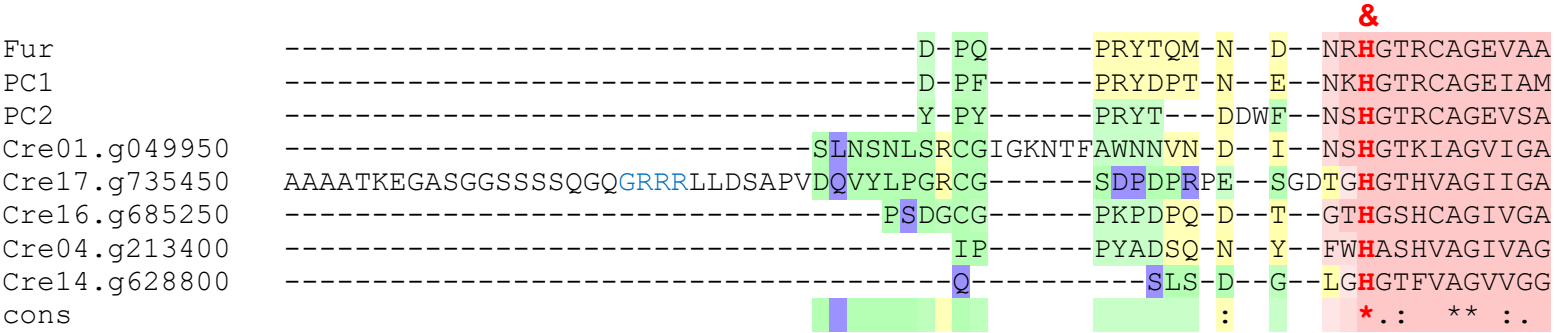

|               |                                                                          |                                                   |
|---------------|--------------------------------------------------------------------------|---------------------------------------------------|
| Fur           | VANNGVCGVGVAYNARIGGVRMLDGE-----VTDAVEARS                                 | LGL-----NPNHIHIYSASWGPED-DGKTVDG                  |
| PC1           | QANNHKCGVGVAYNSKVGGIRMLDGI-----VTDAIEASSIGF-----NPGHVDIYSASWGPND-DGKTVEG |                                                   |
| PC2           | AANNNICGVGVAYNSKVAGIRMLDQPF---MTDIIIEASSISH-----MPQLIDIYSASWGPTD-NGKTVDG |                                                   |
| Cre01.g049950 | RPNNGIGLAGVAPNLRQMVLKVVDITYFQYAYS                                        | SDVVRAIDYGY-----AKGARIFSMSFGQDARTSATPTN           |
| Cre17.g735450 | VRNGNVGGSGIAPGVRVMPPLKVS                                                 | SDPQGNFW-ASNIVAAAYDYAH-----RMGAHVVSCSFGPYQ-PTLNPD |
| Cre16.g685250 | VRNNGVGISGIAPRVKIMCLKVSTPSNNFY-TAHILKAYDYAY-----RMGAHVVSCSFGPAE-PNMKTIS  |                                                   |
| Cre04.g213400 | SANNG-GIVGIAPEATIIPIKVL                                                  | DNNAG-D-NSFLIQGLLYAASPLGPDGAGADIINLSLGGFGNPNDKN-- |
| Cre14.g628800 | QD--G-ACPGFAPDVEMLTFKVFTDDQVSY-TSWFLDAFN                                 | YAI-----VVKVNVINLSIGGP-D--Y----                   |
| cons          |                                                                          |                                                   |

\$ (oxyanion residue)

|               |                                    |                                                 |       |                             |
|---------------|------------------------------------|-------------------------------------------------|-------|-----------------------------|
| Fur           | -PARL---AEEAFFRGVSQGRGGLGSIFVWAS   | NGGREHDSCNCDGYT--NSI-----YTLSISSATQF            |       |                             |
| PC1           | -PGRL---AQKAFEYGVKQGRQKGSI         | FVWASNGGRQGDNCDCDGYT--DSI-----YTISISSASQQ       |       |                             |
| PC2           | -PREL---TLQAMADGVNKG               | RGGKGSIVWASGGG-SYDDCNCDGYA--SSM-----WTISINSAIND |       |                             |
| Cre01.g049950 | KPSLD---AAATAYRNLFN--KYSNALFVAAAG  | NEWTSL                                          | EGWRS | GNITYSPCMIA---TDNTLCVGGTN-V |
| Cre17.g735450 | -I-DLAQAAAETRLYERAVRPLADKGVLLVAAAG | NEDTNLDRARAVGMPYLPCTLD---LPNVLCVAASN-T          |       |                             |
| Cre16.g685250 | -PDELAAYVAERNLYRAALQPMVDKNMLIIAAAG | NENTNLDQLDQYNTTYMPCFMAKEFPENMLCVTATN-Q          |       |                             |
| Cre04.g213400 | -----DTWALYNKVLNYVASQGV            | LVVAAAGNDALNLGRTR--NTFVSPCEN---GGNTVCVSSTG-P    |       |                             |
| Cre14.g628800 | -----LDQPFVDKVLE-ITSNGVLLVSAIGN    | DGPLYGTLN--NP---A-D---QNDVIGVGGID-N             |       |                             |
| cons          |                                    |                                                 |       |                             |

|               |                                                                         |                       |                           |
|---------------|-------------------------------------------------------------------------|-----------------------|---------------------------|
| Fur           | GNVPWY-----SEACS---STLA-TTYSSGNQ-NEKQIVTTDL-----                        |                       |                           |
| PC1           | GLSPWY-----AEKCS---STLA-TSYSSGDY-TDQRITSADV-----                        |                       |                           |
| PC2           | GRTALY-----DESCS---STLA-STFSNGRKR                                       | NP                    | PEAGVATTDL-----           |
| Cre01.g049950 | NDTIFY-----VF                                                           | AFNQAGTNFGPTTVDM--GAP | AHSIYTDDI-----            |
| Cre17.g735450 | QGGIWR-----EIVANRWVGSNTGPTTVDL--AAPGS                                   | RIVSTLP-----          |                           |
| Cre16.g685250 | DDVRWA-----EIAN                                                         | NKPVGSNFG             | LKYADI--GAPGRLIMSSTP----- |
| Cre04.g213400 | LDVCKTCQDD-WINTCLESPSTWDLKQQLALYSNYGPSAISV--AGPGGDYRSAFEWYAKWYDPATDSFLP |                       |                           |
| Cre14.g628800 | WDNI--ASFSSR---GMSTW-----ELPRGYGRVKPDV--MAYAKDVQG-----                  |                       |                           |
| cons          |                                                                         |                       |                           |

&

|               |                                   |                                         |
|---------------|-----------------------------------|-----------------------------------------|
| Fur           | -----R--QK--CTESHTGT              | SASAPLAAGIIALTLEANKN-----               |
| PC1           | -----D--ND--CTETHGT               | SASAPLAAGIFALALEANPN-----               |
| PC2           | -----Y--GN--CTLRHSGT              | SAAAPEAAGVFALALEANLG-----               |
| Cre01.g049950 | -----A--VNR--NYSAPSGT             | SFATPMVAAGVLSALGG-----TGRA-             |
| Cre17.g735450 | -----G--AT--YGDKTGS               | SMATPLVSGSAAVLSALGAVDGN-----            |
| Cre16.g685250 | ---PV-----A--GNSMT--RWNLKTGS      | SMATPMVSGIGALVLSVLGTGTGNY-----          |
| Cre04.g213400 | GTPPTCWFVDQVLSVGAPNRPDLP-AFIQYTGT | SQAAPAVSGVAALMIHDAAVRQGVDLCAASRAGLKGRAR |
| Cre14.g628800 | -----SKITGGCRSLSGT                | SVASPVVAGAVSLLASTVLP-----DKPGAGEDGRW-   |
| cons          |                                   |                                         |

|               |                          |
|---------------|--------------------------|
| Fur           | --LTWRDMQHLLVVQTSK--P--A |
| PC1           | --LTWRDMQHLLVVTSEYDP--L  |
| PC2           | --LTWRDMQHLLTVLTSK--RN-Q |
| Cre01.g049950 | TPQTPLQIKNILMSS--GDL--L  |
| Cre17.g735450 | --FQAVRARSLLLEG--GDP--Q  |
| Cre16.g685250 | --FQGKEARKIIVES--A-----D |
| Cre04.g213400 | GPLNVAQIKTALARG--AV-YPG  |
| Cre14.g628800 | ALLNPGSMKQALVEG--AVRLPN  |
| cons          | :                        |

**Supplemental Fig.1. Alignment of five S8 subtilisin-like *C. reinhardtii* proteins with human homologs.** The *C. reinhardtii* proteins most homologous to human furin, PC1 and PC2 were identified using BLASTp. Their catalytic core sequences were then aligned using T-Coffee. The residues that form the catalytic triad (D, H and S) are marked in red. The oxyanion residue (N in all prohormone convertases except for PC2, where it is D) is also marked in red. In Cre17.g735450, an insert containing a Pro-rich region separates catalytic triad residues D and H.

## Phylogram

Phylogenetic tree showing the relationships between various Cre recombinase proteins. The tree is rooted on the left and branches to the right. Proteins are grouped into three clusters:

- Cluster 1:** includes the 5 *C. reinhardtii* proteins most like human furin, PC1 or PC2 (green highlight)
  - Cre04.g213400 1.00037
  - Cre01.g049950 0.81436
  - Cre17.g713600 0.39923
  - Cre17.g708400 0.32139
  - Cre03.g145827 0.1853
  - Cre16.g685250 0.24055
  - Cre17.g735450 0.2168
  - Cre14.g628800 0.89151
  - Cre16.g675350 0.85988
- Cluster 2:**
  - Cre10.g459450 0.55592
  - Cre07.g329500 0.63461
  - Cre13.g585800 0.56373
  - Cre02.g076950 1.04512
  - Cre09.g406700 0.76895
- Cluster 3:** delete Cre05.g242700 from alignment – lacks catalytic triad D
  - Cre05.g242100 0.57412
  - Cre05.g242700 0.43396
  - Cre05.g242750 0.08948
  - Cre05.g242856 0.08695
  - Cre03.g190250 0.54155
  - Cre03.g170300 0.6062
  - Cre19.g750447 0.74282

\*BAD AVG GOOD \* TCS (transitive consistency score) color code goes from 0 (blue) to 9 (red).

**Cluster 1:** Cre01.g049950 (VLE1, sporangin); Cre03.g145827; Cre04.g213400; Cre14.g628800; Cre16.g685250; Cre17.g708400 (Pro-rich insert between H and oxyanion residue); Cre17.g713600 (Pro-rich insert between H and oxyanion residue and N → D for oxyanion residue); Cre17.g735450 (Pro-rich insert between H and oxyanion residue).

|               |                            |                                                                     |               |
|---------------|----------------------------|---------------------------------------------------------------------|---------------|
|               | &                          |                                                                     | &             |
| Cre01.g049950 | TSDVVGVTDSGAFVNHPDLIG---   | SFWENPAEIDNLDLRDNDNTYIDDVYGACFANS--VCS-PTSLS-                       | NNVNDINSHGTKI |
| Cre03.g145827 | VSDVVVAVIDTGC DLTHPDLQG--- | QLWTNPGEIPGNGVDDNGYIDDVHGFDFAGS--CE-SDWRSTK-                        | PDPQDTHSHGTHC |
| Cre04.g213400 | GKCVRVAVLDTGMWWDHPDLAG---  | RVDVDYARSFVD-----GI-                                                | ADSQNYFWHASHV |
| Cre14.g628800 | GRGVRVGIFDTGIRPDHPHIRHIRER | TNWTHQQSL-----                                                      | SDGLGHGTFTV   |
| Cre16.g685250 | -PEVIVAVVDTGC DLTHPDLKD--- | NLWINTKEIPGNGVDDDG NGLIDDVYGYDFAGT--CE-NDYPS-                       | PDPQDTGTHGSHC |
| Cre17.g708400 | P-DVIVAVVDTGFDIDHPDLKP---  | NLWVNPGVEVPGDGIDNDGN GFIDINGFDFAGSGDACQ-GDWRARA-(53 aa insert)--    | PESSD-TGHGTHV |
| Cre17.g713600 | --TVVVAVVDGGFDTRHPDLAG---  | ALWVNPGIEIPGN GIDDDGN GFVDDVNGWDFGGN--CSSGAWRPAP-(43 aa insert)--   | PEAGD-GGHGTHV |
| Cre17.g735450 | VREVI AVLDTGVDLAHPDLAP---- | NLWVNTGEVPPNN GIDDDGN GFVDDA FG YDFAGP--CS-TDWRAVP-(133 aa insert)- | PESGD-TGHGTHV |
| cons          | * : : * *                  | ** :                                                                | : *           |

|               |             |                             |                 |                   |                      |           |                  |                       |    |
|---------------|-------------|-----------------------------|-----------------|-------------------|----------------------|-----------|------------------|-----------------------|----|
| Cre01.g049950 | AGVIGARPNN  | GIGLAGVAPNLRQ               | MVLKVVDDTYFQYAY | SDVVRAIDYG        | -----YAKGARIFSMSFGQD | ARTSA--   | TPTNKPSLDAAA     | TAYRNLFNK--           | YS |
| Cre03.g145827 | SGIVAALRN   | -----IGIAPRVKVMCLKVATP      | NGAFYT          | SHILKAYDYA        | -----YNMGAHIASCSFGPA | EPNLQP    | TPQEVEEMWNETK    | FYKTALDPMVKK          |    |
| Cre04.g213400 | AGIVAGSANNG | -GIVGIAPEATIIP              | IKVLDDNAG-DN    | SFLIQGLLYAASPLGPD | GAGADIINLSLGGFG      | GNPNDK-ND | -----TWALYNKVLNY | VASQ                  |    |
| Cre14.g628800 | AGVVGQD     | --G-ACPGFAPDVEMLTFKVF       | TDDQVSYT        | SWFLDAFNYA        | -----IVVKVNVINLSIGGP | DYLDQ---  | P-----FVDKVL     | EITSN                 |    |
| Cre16.g685250 | AGIVGAVRNNG | VGISGIAPRVKIMCLKVSTPSNNFYT  |                 | AHILKAYDYA        | -----YRMGAHVVS       | CSFGPA    | EPNMKTISPDELA    | AYVAERNLYRAALQPMVDK   |    |
| Cre17.g708400 | AGIVA AVRNS | VAAVAGAAPRVKVMVLKVFDASGRVYA |                 | SHVVAAYAYA        | -----QRMGAHIV        | VSCSFGPD  | TPNLQ-PQPYEVA    | EMVAQESLYSSAVTPLESK   |    |
| Cre17.g713600 | AGVIAAVRK   | DLAGTSGVAPHVRLMLLKVV        | DGYGATYG        | SRVAAALEYA        | -----GRMGAHV         | VVTSVGPS  | APLPSAPRPYQ      | LAANAAAAAVYAAAVGSLRDK |    |
| Cre17.g735450 | AGIIGAVRNG  | VGSGIAPGVRVMPLKVSDPQGNFWA   |                 | SNIVAAYDYA        | -----HRMGAHV         | VVSCSFGPY | QPTLN-PDAIDLA    | QAAAETRLYERAVRPLADK   |    |
| cons          | :*::..      |                             | * ** : : **     | : . . *           |                      | . : *. *  |                  | .                     | .  |

### \$ (oxyanion residue)

|               |               |                                                |           |                         |                          |                     |             |                   |                         |
|---------------|---------------|------------------------------------------------|-----------|-------------------------|--------------------------|---------------------|-------------|-------------------|-------------------------|
| Cre01.g049950 | NALFVAAAAG    | NEWTSLEGWRS                                    | SGNYTYS   | SPCMIA                  | -----TDNTLCVGGTNVNDTIFY  | -----VF             | AFN--       | QQAGTNFGPTTV      | DMGAPAHSIYT             |
| Cre03.g145827 | GMLVVAAAAG    | NENTPLESLDAVNSTYNPCFMAR                        |           | --YFADSM                | LCVMATNPNSRWF            | -----EIAAN          | ---         | KPIGSNYG          | TKYADIGAPGRQIYS         |
| Cre04.g213400 | GVLVVAAAAG    | NDALNLGRT                                      | --RNTFV   | SPCEN                   | -----GGNTVCVSSTGPLDVCKTC | QDDWINTCLES         | PSTWDLKQQ   | ---               | LALYSNYGPSAISVAGPGGDYRS |
| Cre14.g628800 | GVLLVSAIGN    | DGPLYGTILN                                     | -----NPAD | -----QNDVIGVGGIDNWDN    | IAS                      | -----FSSRGMST       | WELPRGYGRV  | KPDVMAYAKDVQG     |                         |
| Cre16.g685250 | NMLIIAAAAG    | NENTNLQDLQYNTTYMPCFMAK                         |           | --EFPENML               | CVTATNQDDV               | RWAEIANN            | ---         | KPVGSN            | FGLKYADIGAPGRLIMS       |
| Cre17.g708400 | GVLVVAAAAG    | NELTDLNLGLASVKSNYLPCTLP                        |           | -----NSNVMCITGSNPLDRAIT | -----GMAGN               | ---                 | MPVGVNYGTAV | VDMAAPGQDIYN      |                         |
| Cre17.g713600 | GVLVVAPAG     | DDGIDLDAAKAAGLEYLPCTLAAPPYSLGNVLCVGAADASDRRIRI |           | -----AVPGLD             | ---                      | PALGSNYGSSSVSIAAPGV | DIYS        |                   |                         |
| Cre17.g735450 | GVLVAAAAG     | NEDTNLDRARAVGMPYLPCTLD                         |           | -----LPNVLCVAASNTQGGIWR | -----EIVAN               | ---                 | RWVGSN      | TGPTTVDLAAPGSRIVS |                         |
| cons          | . *.::.. *: : |                                                | *         |                         | . : : . . .              |                     |             | . *               | . : . .                 |

### &

|               |           |                 |                      |                     |                            |               |            |     |
|---------------|-----------|-----------------|----------------------|---------------------|----------------------------|---------------|------------|-----|
| Cre01.g049950 | TDI       | -----AVN        | -----RNYSAPSGT       | S                   | FATPMVA                    | AVAGLVLSAL    | -----GGTG  | --  |
| Cre03.g145827 | TVP       | -----KLI        | -----GN              | -----GYATYAYKT      | GSSMATPMTAGV               | GALVLSVL      | -----GAG   |     |
| Cre04.g213400 | AFEW      | -YAKWYDPATDSFLP | GTPTTCWFVDQVLSVGAPNR | PDLP                | AFIQYTGTSQAAPAVSGVAALMIHDA | AVRQGV        | DLCAASRAGL | KGR |
| Cre14.g628800 | SKI       | -----T          | -----GGCRSLSGT       | SVASPVVAGAVSLLAS    | TVLPD                      | -----KPGAGEDG |            |     |
| Cre16.g685250 | STP       | -----PVA        | -----GN              | -----SMTRWNLKTG     | SSMATPMVSGIGALVLSVL        | -----GTG      |            |     |
| Cre17.g708400 | TFP       | -----ISL        | -----GSYGNKTG        | SSMATPLVAGVAALVASV  | -----GAVG                  | PL            |            |     |
| Cre17.g713600 | TLPDRWAQV | VDPV            | TG                   | -----GGYGNMSG       | SSAAAPVVAGVAALVVG          | -----GAV      |            |     |
| Cre17.g735450 | TLP       | -----G          | -----ATYGDKTG        | SSMATPLVSGSAALVLSAL | -----GAV                   |               |            |     |
| cons          | :         |                 |                      |                     | :*:* ** * . . . *          |               |            |     |

|               |       |                          |              |              |               |   |
|---------------|-------|--------------------------|--------------|--------------|---------------|---|
| Cre01.g049950 | --RAT | -PQTPLQIKNILMSSGDL       | LLPSLNN--    | QFKSARR      |               |   |
| Cre03.g145827 | --TGN | -YFQGQAARKIIVESADRLVDLPV | --R--        | TGSRINAQRAVQ | QAR           |   |
| Cre04.g213400 | ---   | ARGPLNVAQIKTALARGAV      | -YPGGAV      | DREAYGA      |               | G |
| Cre14.g628800 | --RWA | -LLNPGSMKQALVEGAVRLPNLNI | --YEQGS      |              |               | G |
| Cre16.g685250 | --TGN | -YFQKEARKI               |              |              |               |   |
| Cre17.g708400 | VASPN | -YYQASSSVKSLLE           | TADKLPGLPV-- | I--          | GGRRINAQRAVEA | A |
| Cre17.g713600 |       |                          |              |              |               |   |
| Cre17.g735450 | --DGN | -YFQAVRARSLLL            |              |              |               | E |
| cons          |       |                          |              |              |               |   |

=====

**MSA** *The multiple sequence alignment result as produced by T-coffee.*

T-COFFEE, Version\_11.00.d625267 (2016-01-11 15:25:41 - Revision d625267 - Build 507) Cedric Notredame SCORE=64

\*BAD AVG GOOD\* (transitive consistency score) color code goes from 0 (blue) to 9 (red).

**Cluster 2:** Cre02.g076950 (Insert between oxyanion residue and S); Cre07.g329500; Cre10.g459450; Cre13.g585800; Cre16.g675350 (Insert between D and H).

&  
 Cre02.g076950 GWDVKVGIVDTGVDIRHPALG-----G-----GFGPG-----FKVAYGR-----DF-  
 Cre07.g329500 GSGSHIYVLDTGIRSTHYAFS-----G-----RVGAGT-----SM-  
 Cre10.g459450 -AGVTIYALDSGVFAQHDEFQ-----SW-----GTAPA-----AG-SGAATA-----GRASYGH-----DF-  
 Cre13.g585800 -TGVTAIVVDSGVRGSHSTQFR-----PL-----LPPA-----QQ-PAAPTA-----PRAVSPSPGRSRVQHGY-----SVF-  
 Cre16.g675350 GRGVKICIFDTGVDPGAAGLQITTDGKPK-(25 aa)-CIAGASGRKLRLNPDWKNPTGEWRVG-(56 aa)-KKERAELEGRVAALK-(58 aa)-GTF-  
 cons . . \* : \* : : . : . : .

&

|               |             |              |                                                      |                                            |                                   |
|---------------|-------------|--------------|------------------------------------------------------|--------------------------------------------|-----------------------------------|
| Cre02.g076950 | AGDA---     | FKPGGVPA---- | PDADPMDCAHGHTHVAGIIAGSYSSADWSFSGVAPGVTLGAYKVFVGCTG-- | GTTSELVVAALDAA----                         | AADGMQ--VINLSL                    |
| Cre07.g329500 | -----       | -----        | LGSSWEDDHGHGTHVSGTAMGAT-----                         | YGVARAAIVHAVKVCDSQG--                      | SGTYSNFISGLGWVKNHVQNNGIKIQAVVSMSL |
| Cre10.g459450 | VD-----     | -----        | GDAEAADCDGHGTHVASTAVGRS-----                         | VGVARGAELVAVRVLDCSG--                      | SGSIADTVAGLDWL---AKHKVRPAVAMLSL   |
| Cre13.g585800 | TATA---     | GG---LGG---- | SGGGSDSCYGYHGTHTVASLLGGVD-----                       | YGKANVTITVPVQVLDCNG--                      | NTSETLLKQGLEWV---GRNLVLPVVVHMSL   |
| Cre16.g675350 | SELDACNFV-- | LNILDGGR     | TLSVVVDDCGAHGTHVAGITAAHFDP--                         | DPSGNIGAPGAQIISKIGDTRLGSMETGTGVVRGLIAA---- | RQH---GAHLINMSY                   |
| cons          |             |              | . * . *                                              | * : *                                      | : . :                             |

\$ (oxyanion residue)

|               |                |                |                     |                  |              |                |                  |
|---------------|----------------|----------------|---------------------|------------------|--------------|----------------|------------------|
| Cre02.g076950 | GD-EGAWG----   | GPVAEAAARLA-G- | LGVLVVAAVG-NAGP-SG- | (231 aa insert)- | NALTPTVPVA-- | TIPALSPQSPPPPS | GQGQGQTGGNGATQGS |
| Cre07.g329500 | ---SGPRS---    | ASLNDAIQDVV-N- | NGITVVVVAAGNNGGDS   | -----            | CSYSPGSAPA-- | AISV-----      | -----            |
| Cre10.g459450 | GVPAGDW----    | RVLGEAVSVLV-SQ | HGVPVVAASGNAAV-DS   | -----            | CGITPANLPE-- | VITVAASN-----  | LE-----G-        |
| Cre13.g585800 | ---EGGYS---    | AAVNAMVDSLT-A- | LGAVVVASAGNSNR-DT   | -----            | CAVSPASAQS-- | AV-----        | -----            |
| Cre16.g675350 | G---EPTTTPNAGR | FIELATELVRK-   | HGVIFVASAGNAGP-AL   | -----            | TTVGAPGGTSSA | LFGVGAYV-----  | -----            |
| cons          |                | :              | * . * : *           |                  | .            | .              |                  |

Cre02.g076950 QGRDSSPSSAVTASSPPPPSPPPSPAPPGSPKPGNSGNTPAKSPSPFFFPFPPSPSPPTGKPPSPPPPSPPPPAPPPPSPPPSPPPPSPPPAPPIKKW-  
Cre07.g329500 -----  
Cre10.g459450 -----KFNTSAR-----RPPPLQPPL-----A-----SPRPLPPLQPPPREPMYS-----  
Cre13.g585800 -----  
Cre16.g675350 --SP-----QLAAAGH-----  
cons 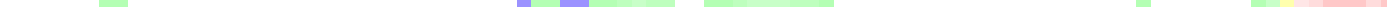

&

|               |                                                                                                         |
|---------------|---------------------------------------------------------------------------------------------------------|
| Cre02.g076950 | (47 aa insert)-SSGSSGNSGSI-(84 aa insert)--LASPFSSWGPTDPLHIEPMLAAPGGAVLSTVPIVTRADGSRSTGYAYLSGTSQSAPYVAA |
| Cre07.g329500 | -----GSSNRDD-----SLSSFNVGVCVF-----TFPGGSIVSAYNTADNA-----EATMSGTSMATHPVSG                                |
| Cre10.g459450 | -----WSNTGKCVD-----LFAPGVEIFGACGGKDRCPAVTASAYTWASGTSMAVPAVAG                                            |
| Cre13.g585800 | -----AVAAVEADG-----TRWYRSNWGCVD-----LFAPGVSLLAAPVWTDSA-----SGLKTGTSM AAPFASG                            |
| Cre16.g675350 | -----SVLEAPAEC-----LQYNWSSRGPTSDGHGTGVAFSAPGGAIAPVPQWTQR-----RQLMNGTSMSSPNACG                           |
| cons          | *   *                    **      :   .                    ***     *:   ..                               |





|               |                                      |                                  |                 |                     |        |               |
|---------------|--------------------------------------|----------------------------------|-----------------|---------------------|--------|---------------|
| Cre03.g170300 | GARLAFFDIMNKKK-----EYLL---PS---YDDL  | LTHQLESGVLVQSDSWGNGKQT--FWYNG    | LCHQLDEV        | TWRHPELLVLTAAGNDGNM | QPP    | PANGTVS       |
| Cre03.g190250 | RARLTFNDIGGTG-----GNLIN---IDN--VDE   | LYLPFHKNVGAAITSDSWGPMWS---NYDGL  | ARRFDSFLWRNPDM  | TSFIAAGNSGDDNTR     | -VG    | GTVD          |
| Cre05.g242100 | GARLSVIDISTAG-----GGLTV---PSP--MDQ   | TLLQVHASAGVSITSDSWGVLRS---DYTAA  | ANDFDRYLWSHGDH  | VALVAAGNYQSPGL      | -RSG   | QVVT          |
| Cre05.g242750 | RAKLSVVDISLPLV-RGDPEAGLQT---PEP--VDD | VYLRLHYEVGARVTSDSWGTDIN---IYEETA | QAYDAFLWRNPDS   | IAFIAAGNNGSDALT     | -PGGS  | SIG           |
| Cre05.g242856 | RAKLSFVDISLTAAAAGGLQALGP---PEP--VDD  | VYLRLHYDAGARITSDSWGAVAN---IYDDFA | QAYDAFLWRNPDS   | IAFIAAGNNGSDALT     | -PGGS  | SIG           |
| Cre09.g406700 | MARLSFADLATSS-----ASLTGLSYPGDYEFEE   | QTFGRHYGNGARLFSFSGVSDSSGLSYGS    | WGAAADDYLWRHPET | LVVAAGNNGANGY---    | MSTVQ  |               |
| Cre19.g750447 | AARIAFMDLSDKG-----DGVWT---PGD--LGR   | SYFNLTYRVGARVHSDSWGSDLT---AYDSMA | AALDRFTWNNPDFL  | SIFAAGNYGTAS-GA-    | TTTVT  |               |
| cons          | *:::.*:                              |                                  |                 | :                   | *.:*** | *:*:*::.*.*** |

|               |                                 |                             |                       |              |              |
|---------------|---------------------------------|-----------------------------|-----------------------|--------------|--------------|
| Cre03.g170300 | NTLSVGSTLSLTASSTNGGALT          | TLHVVTGGPEPPPEDPALVAASLPA   | EDAAALMSGDT-----AALS  | -----        | APANAKALYG-- |
| Cre03.g190250 | NVVGVGVGKYPAGVSFA-T-LLKIRGYQPS  | -----SAG-----D--VR          | -----                 | -----        | SPANAK       |
| Cre05.g242100 | NVIAVGSCLSPPFTFYYP-FYTVRGRRLG   | -----SGQ-----AWSQVWPIECRDVG | ARDFLTGVGGPSGRNATLELV | HPAAAKAVSGWS |              |
| Cre05.g242750 | NIVAVGATYRVPAELGIGPQ-VLEVRGSTPG | -----TDG-----STPTE          | -----                 | -----        | TPATAK       |
| Cre05.g242856 | NPVAVGATWRVPAELGLGAR-LLQVRGYNPA | -----ADLD-----ASTSTE        | -----                 | -----        | APATAK       |
| Cre09.g406700 | NVLSAGASVNHPRDENPWANQWLPLFTYRDG | -----QGQ-----T-QQA          | -----                 | -----        | TPGSAK       |
| Cre19.g750447 | NCIAAGATPSMGTGDRP-GAYGVTVYNT    | -----                       | -----                 | -----        | SPAVAK-TA--  |
| cons          | *:.*.:                          |                             |                       |              | *.***        |

|               |                              |                             |                         |                       |
|---------------|------------------------------|-----------------------------|-------------------------|-----------------------|
| Cre03.g170300 | SSVISALAA-QAAAAAQAASGGGSSGDS | SSSSDGSGAGFDGAVAAALVDISFGGR | KAPAAATSSPPAGAAV-KAADDE | (50 aa insert)-EGLTLE |
| Cre03.g190250 | -----LFDLALQPA-----          | -----ETGG-----              | LPYLSSV-VSATSE-----     | TL                    |
| Cre05.g242100 | LQPRPPDFATGTLAQQQG-----      | -----EDGC-----              | GELPA-----PGPSF-----    | AP                    |
| Cre05.g242750 | -----VLRLSVYPM-----          | -----ENPD-----              | LPQLLNI-IPLGSQ-----     | VP                    |
| Cre05.g242856 | -----LFRLALYPE-----          | -----ENPD-----              | LPQLLRV-IPADSE-----     | VP                    |
| Cre09.g406700 | -----VWVT-----               | -----ARGSS-----             | SATWRNL-VEDQPP-----     | FA                    |
| Cre19.g750447 | T-----VNIGGGQGARSV-----      | RVVGAAFGGD-----             | LAAAVSAAAA-----         | NGGVVA                |
| cons          |                              |                             | .                       |                       |

|               |                             |                        |              |                          |                             |                |
|---------------|-----------------------------|------------------------|--------------|--------------------------|-----------------------------|----------------|
| Cre03.g170300 | AVAASPLNACA---RLNDSSSASN    | NNKTAA                 | DAASAGAAAPL  | PKLLIT-----TRDG-----C--  | MPYVKAAAAAAGAAALAIANDAP     | GPA---VA-IL-   |
| Cre03.g190250 | VGVSTPIDACE---PLYPEA-----   | LAHVP-----GRVVLVS----- | YSDR-----C-- | DVDTRARNLQDAGAAAMMIH     | SPNMEYT-ESPPLSN             |                |
| Cre05.g242100 | AGPAAFSSSCSLPPGL-VAS-----   | GALA-----GAVAVAP-----  | ASPN-----C-- | SLVEQVLALQRAGAAAVLLGYTE  | PSNP---PTPVLVS              |                |
| Cre05.g242750 | LVVADPPDACT---PLTNPA-----   | AEVR-----GAVVLA-----   | VRGE-----C-- | WFYQKVLHVRAAGGGAVIFVNNVP | EMMDSPPAPVYPN               |                |
| Cre05.g242856 | LVVADPPDACT---PLTNPA-----   | AEVR-----GAVVLA-----   | VRGE-----C-- | WFYQKVLNVRAAGGGAIIFVNNVP | EMMDSPPYPIYPN               |                |
| Cre09.g406700 | VVLASPLHACT---PLQVPVGSAS    | -----PSQYQ-----        | GAIVIIDPVADT | SPDGLTPPD                | CQGVLDSDRASYAMEAGAVAVWFVWRY | YRTVL---SEAYVI |
| Cre19.g750447 | LAAATPADACT---GLSNAGGV----- | R-----GRVLLV-----      | QRGR-----C-- | YFSDKARAAAAAGATAVIVYND   | KQDGYFLMEAPDAS-             |                |
| cons          | : :*                        | *                      |              | :                        | *                           | :. **.*:.      |



```

Cre03.g170300 ----VNPTGSTLPAAALTQDLGARIFAALAAG--QR-V-FARA-SWQ---PQGPYDHVPAFSGWGPTNDGRVKPDIVAPGWRVVSAYSD----FVSAGVS--
Cre03.g190250 ----SDGPAIRIPVSSIPQVMGGWLVGNVTAG--VE-L--RLT-WQD---YPQSVGDVVRWSGYGPTRDGRIKPDVIAPGYDIVSAKAVD-----GIT--
Cre05.g242100 SPSAALNSTGV TIPVGYITQSLCSWLLGNMSAS--SRPV--TFSVSL---ASQGINSVASFSSAGPALDGRVKPDLVAPGFQLTSAWKTGAGAGAGAGTT-Q
Cre05.g242750 ----SNYYAAKMATSVISQGLGQWLLGNASAG--VE-L--SLA-NTV---KNAGSDTVAFFSSYGPMADGRIKPDIVTPGVLITSAGAKG-----GIT--
Cre05.g242856 ----SNSYAANMATSVISQGLGQWLLGNASAG--VL-M--TLA-NIV---EAAGPDTVAYFSSYGPMADGRIKPDVVAPGLYITSAGARG-----GIT--
Cre09.g406700 ----QGVSVIPLPYSIITREQGDWLQQVMTDPSHSE-F--RFQ--NITYPLVNGGEESLAFFSSYGPTPDGRFKPDLVAPGQRLISASSGA-----GLRAV
Cre19.g750447 ----GGSGSGLVPMGSVPASTGRWLLAAAAAG--NTAVSIRRA-ADV---APLAFDDVAAYSSFSGPTTDGRIKPDITAPGHLLS-ANANPT--LAPDGAV--
cons      .      : . . : . :      .      .      .      : : * . * * * . * * : * : *

```

&

```

Cre03.g170300 D-GC-AV-RMTMEGTSMSAPLVAGAALLARQYFESGHYPAGRTDAPEAAPFSPSGVLLKAVLIGGAYDMSRSGGLSFSTLQPLLPAAPSAYQGFG
Cre03.g190250 GGQC-NDETQEMSGTSMATPLAAGSAALLRQYLRSGFYPGGWPDTQDSAPFKPSGILVKALVIAGAKS--LQGGWALQVARLLSTAPDYQGWG
Cre05.g242100 GDTG-GVSVAAARSGTSMSTPTAAGHTALVRQYLRTGFYPTGSPADAAAAPFTPSGMILLKAMVIAGAKS--MEGGEAMATRAPLGPPPDAYQGWG
Cre05.g242750 GGAC-SPAQANLSGTSMATPHAAGHTALVRQYLRTGFYPTGSPADAAAAPFTPSGMILLKAAIAGAKS--LQGGLAMALGIPMGPPPDAYQGWG
Cre05.g242856 GGAC-SPAQANLSGTSMATPHAAGHTALVRQYLRTGFYPTGSPADAAAAPFTPSGMILLKAAIAGAKS--LMGGLAMALGIPMGPPPDAYQGWG
Cre09.g406700 ETSC-SLEMRLAGTSMSTPVVAGNLAIARQYLTEGWYPAGWRGAPDSAPFVPSGPLLKAIAIAGAKS--LQGGLARAPGQLMGTPPDGYQGWG
Cre19.g750447 P-SCGAGATRILSGTSMATPVIAGSALL-----
cons      *      * * * : : * * * :

```

**Supplemental Fig.2. Alignment of S8 domains of 21 *C. reinhardtii* family members.** Phytozome identifies 21 proteins that contain the subtilisin-like S8 domain. A phylogenetic tree constructed using all 21 S8 domains, identified subclusters, which are marked. For each subcluster, catalytic core sequences were aligned using T-Coffee. Catalytic triad residues are marked, along with the oxyanion residue.

**Supplemental Fig.3. Alignment of two M14 CPB-like *C. reinhardtii* and human proteins.** Alignment of *C. reinhardtii* CPB-like enzymes CPZ2(Cre06.g309450) and CPZ3 (Cre07.g335900) with the three M14 domains of human CPD (CPD1, CPD2, CPD3) and the M14 domain of human CPE. M14 catalytic core sequences were aligned using T-COFFEE, Version\_11.00. 8cbe486 (2014-08-12 22:05:29 - Revision 8cbe486 - Build 477). Cedric Notredame. SCORE=79. \* **BAD AVG GOOD**\* TCS (transitive consistency score) color code goes from 0 (blue, bad) to 9 (red, good).

|      |                                                                                                   |
|------|---------------------------------------------------------------------------------------------------|
| CPD1 | AHIKKA <b>E</b> -----ATTTTTSAGAEAA-EGQ <b>F</b> -----DRYYHEEE-L <b>E</b> S--                      |
| CPD2 | -----Q-----PI-----Q-PK-D-F-----HHHHFPD-M <b>E</b> I--                                             |
| CPD3 | ----TTK-----EF-----ETLIK <b>D</b> -LSAENGLESMLRSSSNLALALY <b>R</b> ---YHSYKD-L <b>S</b> E--       |
| CPE  | -----L-----QQ-----ED-GI-S-F-----EYHRY <b>P</b> E-L <b>R</b> E--                                   |
| CPZ3 | -WTSAAQGLRRPDADLPATSELDNGGTSAQQLGSAL-----RPL-SD <b>T</b> F-----VAT <b>R</b> NGQLTDGQ <b>E</b> FAS |
| CPZ2 | -YPTFA-----Q-L <b>S</b> E--                                                                       |
| cons | 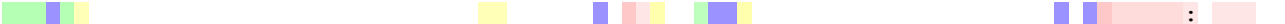                |

|      |                                                                                                                                                                                                |
|------|------------------------------------------------------------------------------------------------------------------------------------------------------------------------------------------------|
| CPD1 | ----AL---REAAA <b>G</b> LPGLA-----RLFSI-GRSVEGRPLWVLR <b>L</b> T <b>A</b> GLGSLI <b>P</b> EG <b>D</b> AGPD <b>A</b> AGPD <b>A</b> AG-PL <b>L</b> P-GR <b>P</b>                                 |
| CPD2 | ----FL---RRFANE-YPNIT-----RLYSL-GKS <b>V</b> ESRELYVMEIS <b>D</b> -----NPGV <b>H</b> ---E-----PG-----EP                                                                                        |
| CPD3 | ----FL---RGLVMN-YPHIT-----NLTNL-GQ <b>S</b> TEYRHL <b>I</b> WSLEIS <b>N</b> -----KPN <b>V</b> S---E-----PE-----EP                                                                              |
| CPE  | ----AL---VSVWLQ-CTAIS-----RIYTV-GR <b>S</b> FEGR <b>L</b> LVI <b>E</b> LS <b>D</b> -----NPGV <b>H</b> ---E-----PG-----EP                                                                       |
| CPZ3 | PPPGEFVGDEW <b>A</b> RY <b>H</b> N---HDEMVR <b>L</b> LQDVVN <b>S</b> NG <b>A</b> CT <b>D</b> EL <b>D</b> PPSV <b>E</b> GRVLYAVVAS <b>P</b> R-----NP-----AG <b>G</b> ---AV <b>L</b> PR <b>P</b> |
| CPZ2 | ----YL---A-----LRVAGSLGRCS <b>L</b> ASA-GKS <b>V</b> QGRDLWAVTIG <b>D</b> -----PAGVY <b>Y</b> PD-----PTNP <b>D</b> V <b>P</b> PFKA                                                             |
| cons |                                                                                                              |

|      |                                                                                                                                                    |
|------|----------------------------------------------------------------------------------------------------------------------------------------------------|
| CPD1 | QVKLVGNM <b>H</b> GD <b>E</b> TVSRQVLIYLARELAAGY <b>R</b> -----RGDPRLVR-----LLN-TTDVYLLPSLNPDGFER <b>A</b> REGDCGF <b>D</b> GGPSGA                 |
| CPD2 | EFKYIGNM <b>H</b> GN <b>E</b> VVGRELLLN <b>L</b> IEYLCK <b>N</b> F-----GTDPEVTD-----LVH-N <b>T</b> RIHLMPSMNPDGYEK <b>S</b> QEGDSI-----SV          |
| CPD3 | KIRFVAGI <b>H</b> GNAPVGTELL <b>L</b> ALAEFLC <b>L</b> NY-----KKNPAV <b>T</b> Q-----LVD-R <b>T</b> RIVIVPSLNPDGRER <b>A</b> QEK <b>D</b> CT-----SK |
| CPE  | EFKYIGNM <b>H</b> GN <b>E</b> AVGRELLI <b>F</b> LAQYLCNE <b>Y</b> Q-----KGNETIVN-----LIH-STRIHIMPSLNPDGF <b>E</b> KAA-SQ <b>P</b> G-----EL         |
| CPZ3 | SFTWIGNM <b>H</b> GD <b>E</b> TANRELL <b>L</b> RLAAG <b>L</b> CN-----G-----ELADSDARWKALQ <b>S</b> TTVRIIPTMNP <b>D</b> GYERR-----                  |
| CPZ2 | RAAYIGVM <b>H</b> GD <b>E</b> KGHISAVLRLVGELCD <b>P</b> LSEPKFAPGGV <b>L</b> DSNVTD-----LL-GSTVLYV <b>L</b> PLMNP <b>D</b> GYT <b>A</b> T-----     |
| cons |                                                                |

|      |                                                                                                                                                                                                                                        |
|------|----------------------------------------------------------------------------------------------------------------------------------------------------------------------------------------------------------------------------------------|
| CPD1 | ----SGRDNSRGRDLNR <b>S</b> FP-----DQ <b>F</b> -----STGE <b>P</b> PA--LD--EVPEVRALIE-WIRRN <b>K</b> FVLSGN <b>L</b> H                                                                                                                   |
| CPD2 | ----IGRNNSNNFDLNR <b>N</b> FP-----DQ <b>F</b> -----V-----QITDPTQ-----PETIAVMS-WMKS <b>Y</b> PFVLSAN <b>L</b> H                                                                                                                         |
| CPD3 | ----IGQTNARGKD <b>L</b> DT <b>D</b> FT-----N-----N-----AS-----Q <b>P</b> ETK <b>A</b> IIEN <b>L</b> IQKQ <b>D</b> FSLSVAL <b>D</b>                                                                                                     |
| CPE  | KDWFVGRSNAQ <b>G</b> IDLNR <b>N</b> FP-----DLDRIVYV <b>N</b> EKEGG <b>P</b> NNHLLKNMK <b>I</b> VDQ <b>N</b> TK--LAPETKAVI <b>H</b> -WIMDIPFVLSAN <b>L</b> H                                                                            |
| CPZ3 | ----TRWNANKVDLNR <b>N</b> FW <b>S</b> VEY <b>P</b> YAK <b>P</b> TLD <b>Q</b> A-----RKRDRY <b>G</b> ATM <b>P</b> AA <b>D</b> W <b>S</b> KV <b>G</b> -N <b>F</b> TLQ <b>P</b> EA <b>V</b> AVSR-YLAA <b>A</b> PPDL <b>S</b> AN <b>L</b> H |
| CPZ2 | ----QRYNANGVDLNR <b>N</b> FY <b>T</b> SA <b>F</b> PFAM <b>P</b> TA <b>D</b> G-----YALQPG <b>T</b> SNALY <b>N</b> AA <b>D</b> W <b>T</b> DNGGG <b>A</b> HE <b>P</b> ETQ <b>A</b> VMS-WLASVRPHVSAD <b>L</b> H                            |
| cons | 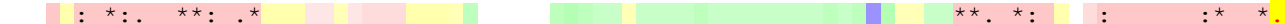                                                                                                                                                   |

|      |                                                                                                                                                                                                                                                                        |
|------|------------------------------------------------------------------------------------------------------------------------------------------------------------------------------------------------------------------------------------------------------------------------|
| CPD1 | GGSVVASYPFDD <b>S</b> PE <b>H</b> KATGIY <b>S</b> KTS <b>D</b> DEVFKYLAKAYAS <b>N</b> HPIM <b>K</b> T-GE <b>P</b> -H-CP-GDEDET <b>F</b> KDGITNGAHWYDVEGG <b>M</b> QDYN <b>Y</b> VWAN                                                                                   |
| CPD2 | GGSLV <b>V</b> NYPFDD <b>D</b> E--QGLATY <b>S</b> KSPDDAVFQ <b>Q</b> IALSY <b>S</b> KENSQ <b>M</b> FQ-GR <b>P</b> --CK <b>N</b> MY <b>P</b> NEYFPHGITNGASWY <b>N</b> VPGG <b>M</b> QDW <b>N</b> YLQ <b>T</b> N                                                         |
| CPD3 | GG <b>S</b> MLV <b>T</b> YPYDK <b>P</b> V--Q--T <b>V</b> ENKE-----TLKHLASLYANN <b>H</b> PS <b>M</b> HM-GQ <b>P</b> -S-CP-NKSDENIPGGV <b>M</b> RGA <b>E</b> W <b>H</b> SLG <b>S</b> MKDYS <b>V</b> TY <b>G</b> H                                                        |
| CPE  | GGDLV <b>A</b> NYPYDE <b>T</b> RS-G <b>S</b> AHE <b>Y</b> SS <b>S</b> PD <b>D</b> AI <b>F</b> QSLARAYSS <b>F</b> NP <b>A</b> MS <b>D</b> -P-NRPPCRK <b>N</b> DD <b>S</b> SFVDGTTNGGAWY <b>S</b> VPGG <b>M</b> QDF <b>N</b> Y <b>L</b> SS <b>N</b>                      |
| CPZ3 | GGALV <b>A</b> NYP <b>L</b> DAC <b>D</b> -S <b>V</b> GALT <b>N</b> C <b>P</b> TA <b>E</b> E <b>P</b> LPRQLAA <b>A</b> Y <b>V</b> HN <b>P</b> N <b>M</b> SAQ <b>G</b> T-----A <b>P</b> FRAG <b>T</b> VQGA <b>A</b> WY <b>P</b> VLG <b>S</b> MQDWVY <b>H</b> HL <b>D</b> |
| CPZ2 | GGALVGSYALD <b>A</b> CD-SRGALL <b>D</b> CP <b>S</b> PE <b>A</b> PLPGYLANV <b>S</b> M <b>N</b> HP <b>S</b> MR <b>F</b> -SW <b>G</b> -E-VQ-AS <b>R</b> QVQ <b>F</b> FN <b>G</b> T <b>Q</b> GATW <b>P</b> AI <b>G</b> TI <b>A</b> DWL <b>H</b> HT <b>Y</b> R              |
| cons |                                                                                                                                                                                    |

|      |                                                                                                                                                                                                                                                                                                                   |
|------|-------------------------------------------------------------------------------------------------------------------------------------------------------------------------------------------------------------------------------------------------------------------------------------------------------------------|
| CPD1 | C <b>F</b> EIT <b>L</b> EL <b>S</b> CKY <b>P</b> PA-SQLRQEWENN <b>R</b> ESLIT <b>L</b> IE-K <b>V</b> HIGVKG <b>F</b> VK <b>D</b> SITGS <b>L</b> ENATIS <b>V</b> -AG--IN <b>H</b> NIT <b>T</b> GR--FG <b>D</b> -FYRL <b>L</b> V <b>P</b>                                                                           |
| CPD2 | C <b>F</b> EV <b>T</b> IELGCVKY <b>P</b> LE-KELPN <b>F</b> WEQ <b>N</b> RRSLIQ <b>F</b> MK-Q <b>V</b> HQGV <b>R</b> GFVLDATDGRG <b>I</b> LNATIS <b>V</b> -AE--IN <b>H</b> PT <b>V</b> TY <b>K</b> --TG <b>D</b> -YWRL <b>L</b> V <b>P</b>                                                                         |
| CPD3 | C <b>P</b> EIT <b>V</b> YT <b>S</b> CCY <b>F</b> PSA-AR <b>L</b> PS <b>L</b> WAD <b>N</b> K <b>R</b> SL <b>S</b> ML <b>V</b> -EV <b>H</b> KGV <b>H</b> GFV <b>K</b> DK <b>T</b> -G <b>K</b> PI <b>S</b> KAVI-V <b>L</b> N <b>E</b> --GI-K <b>V</b> Q <b>T</b> -K--EG <b>G</b> Y <b>F</b> HV <b>L</b> L <b>A</b> P |
| CPE  | C <b>F</b> EIT <b>V</b> EL <b>S</b> CEK <b>F</b> P <b>P</b> E-ET <b>L</b> KTYWED <b>N</b> K <b>N</b> SLIS <b>Y</b> LE-Q <b>I</b> HRGVKG <b>F</b> V <b>R</b> DLQ-G <b>N</b> PIANATIS <b>V</b> -EG--ID <b>H</b> D <b>V</b> TS <b>A</b> K--DG <b>D</b> -YWRL <b>L</b> IP                                             |
| CPZ3 | RLML <b>T</b> IEL <b>H</b> EVKD <b>P</b> PA-TALDD <b>L</b> WGQ <b>N</b> SA <b>A</b> FL <b>R</b> IME-LAG <b>M</b> GLR <b>G</b> R <b>V</b> LDQ <b>Q</b> T-RAP <b>L</b> AATIT <b>V</b> -T <b>S</b> PASSR <b>P</b> ADA-DAAR <b>G</b> GY <b>F</b> Y <b>K</b> PM <b>A</b> P                                             |
| CPZ2 | RHML <b>T</b> IEL <b>H</b> YKY <b>A</b> MF <b>L</b> ND <b>K</b> LNMYAT <b>N</b> R <b>P</b> S <b>M</b> LRLAG <b>V</b> GA <b>H</b> MGLR <b>A</b> LL <b>R</b> DAAS-GA <b>A</b> LAAT <b>V</b> TP-QQ <b>P</b> AGAW <b>A</b> PE <b>V</b> -E--SGGLV <b>V</b> K <b>M</b> AM <b>P</b>                                      |
| cons |                                                                                                                                                                                                                               |



Expression of subtilisin- and CPB-like and PAM transcripts: data from Ning et al., 2013

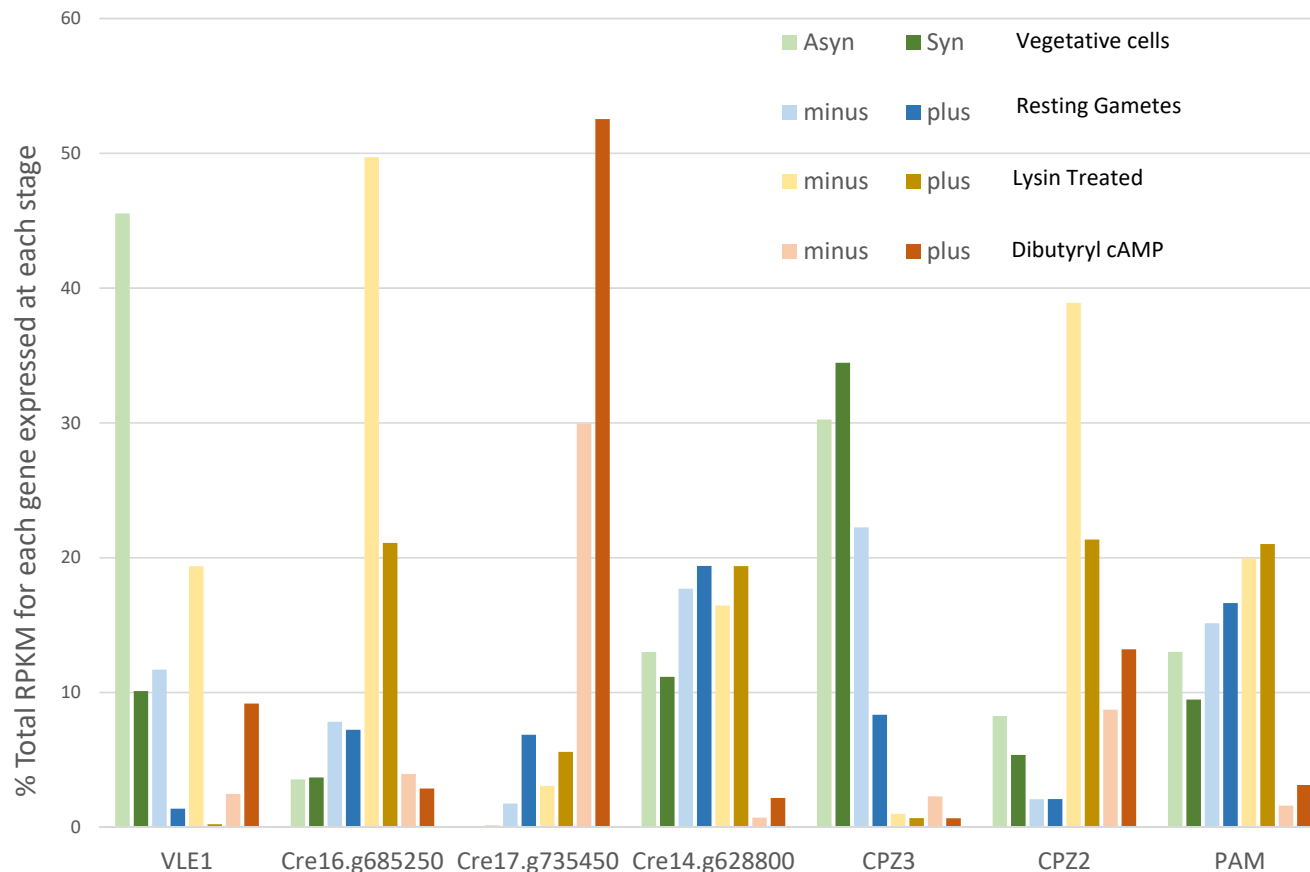

**Supplemental Fig.4. Expression of *C. reinhardtii* subtilisin-like, CPB-like and PAM transcripts.** Relative transcript levels (% total RPKM for each transcript in *plus* and *minus* mating type cells at each stage examined) are shown for the *C. reinhardtii* genes encoding proteins most like human furin, PC1, PC2, CPD, CPE and PAM [19]. Stages examined in this study were: Vegetative cells (Asy, asynchronous, and Syn, synchronous); Resting Gametes; Lysin-treated gametes; Dibutyryl-cAMP treated gametes.
